# Supplementary material for: [HyEtPy]Cl–H2O: an efficient and versatile solvent system for the DABCO-catalyzed Morita–Baylis–Hillman reaction
Source: Royal Society of Chemistry journal article supplement (doi:10.1039/c5ra02102b), 2015-01-01
Supplement: c5ra02102b1.pdf [file c5ra02102b1.pdf]

Supplementary Material (ESI) for RSC Advances.

This journal is (c) The Royal Society of Chemistry 2015

## Supplementary information

### [HyEtPy]Cl-H<sub>2</sub>O: An efficient and versatile solvent system for the DABCO-catalyzed Morita-Baylis-Hillman reaction

Sanhu Zhao,<sup>\*a, b</sup> Meiyang He,<sup>a</sup> Zhaonan Guo,<sup>a</sup> Na Zhou,<sup>a</sup> Dou Wang,<sup>a</sup> Jinlong Li,<sup>a</sup> and Liwei Zhang<sup>\*b</sup>

<sup>a</sup>Department of Chemistry, Xinzhou Teachers University, Xinzhou 034000, Shanxi, China

<sup>b</sup>Institute of Molecular Science, the Key Laboratory of Chemical Biology and Molecular Engineering of Education Ministry, Shanxi University, Taiyuan 030006, Shanxi, China

Corresponding author. e-mail: sanhuzhao@163.com or lwzhang@sxu.edu.cn

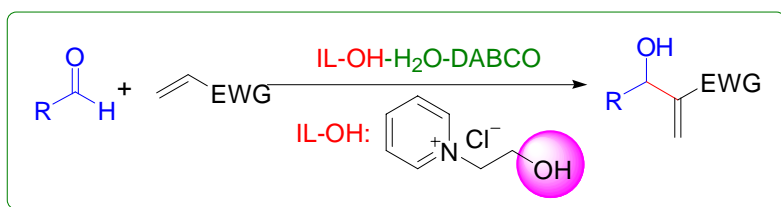

### The NMR spectra for the ionic salts and M-B-H products

# 1. Ionic salt [HyEtPy]Cl

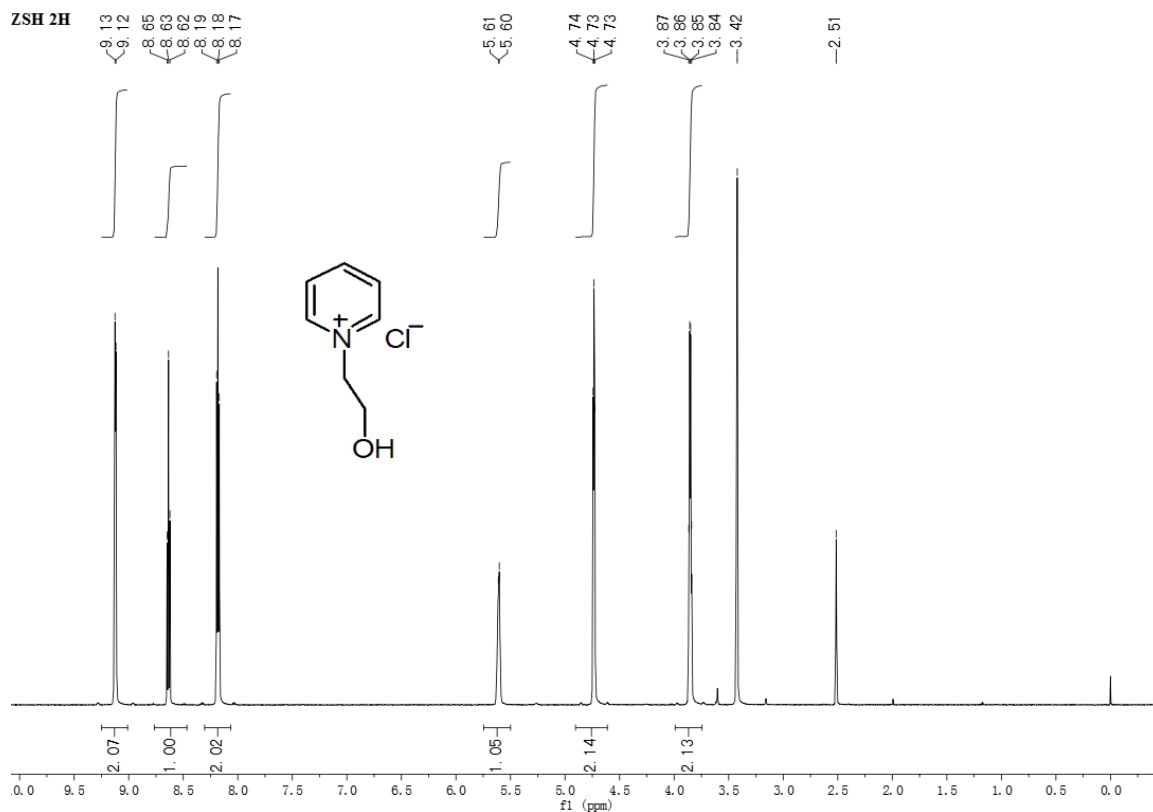

<sup>1</sup>H-NMR spectrum (600 MHz, DMSO-*d*<sub>6</sub>)

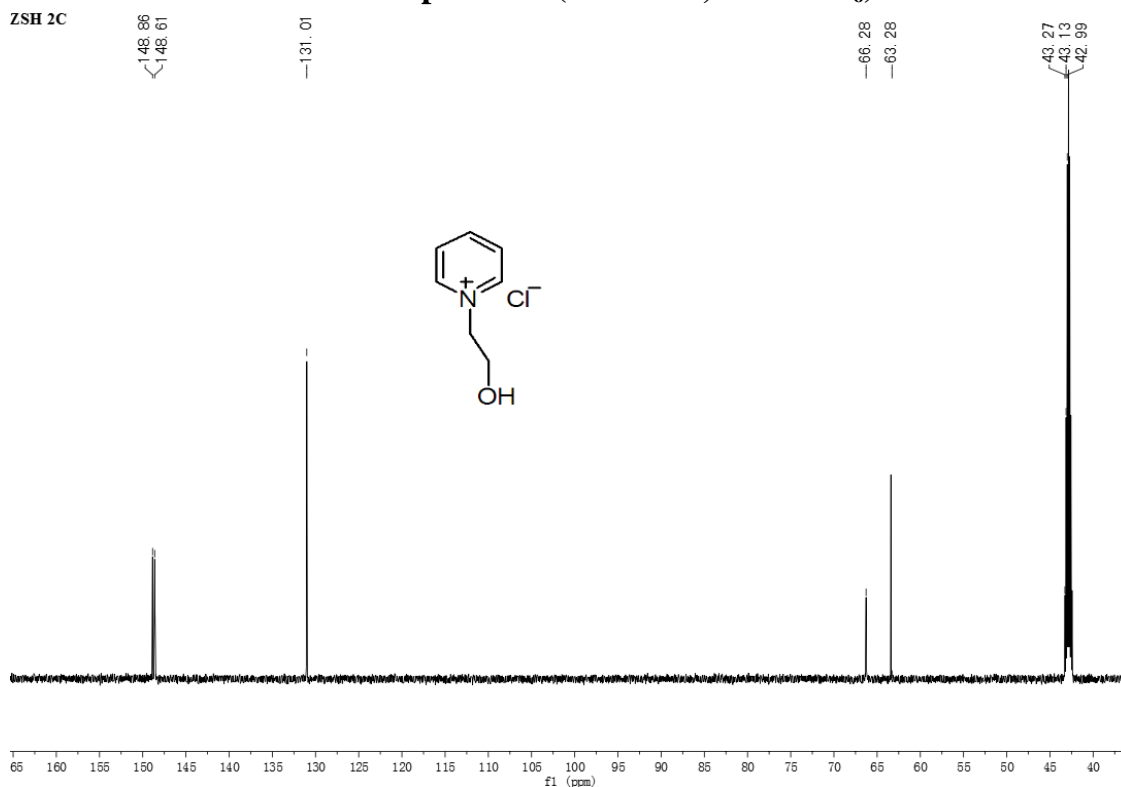

<sup>13</sup>C-NMR spectrum (151 MHz, DMSO-*d*<sub>6</sub>)

## 2. Ionic salt $[n\text{-Bu}_3\text{P}^+\text{CH}_2\text{CH}_2\text{OH}]\text{Cl}^-$

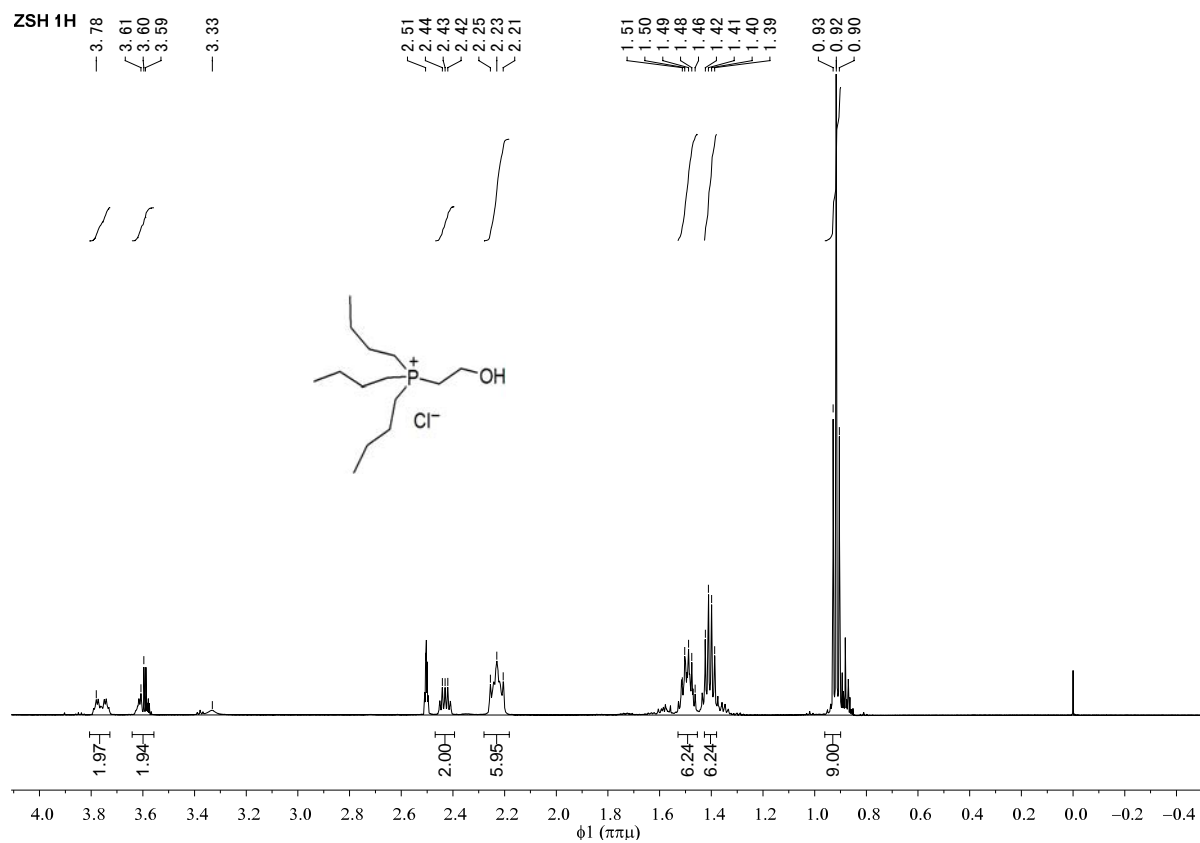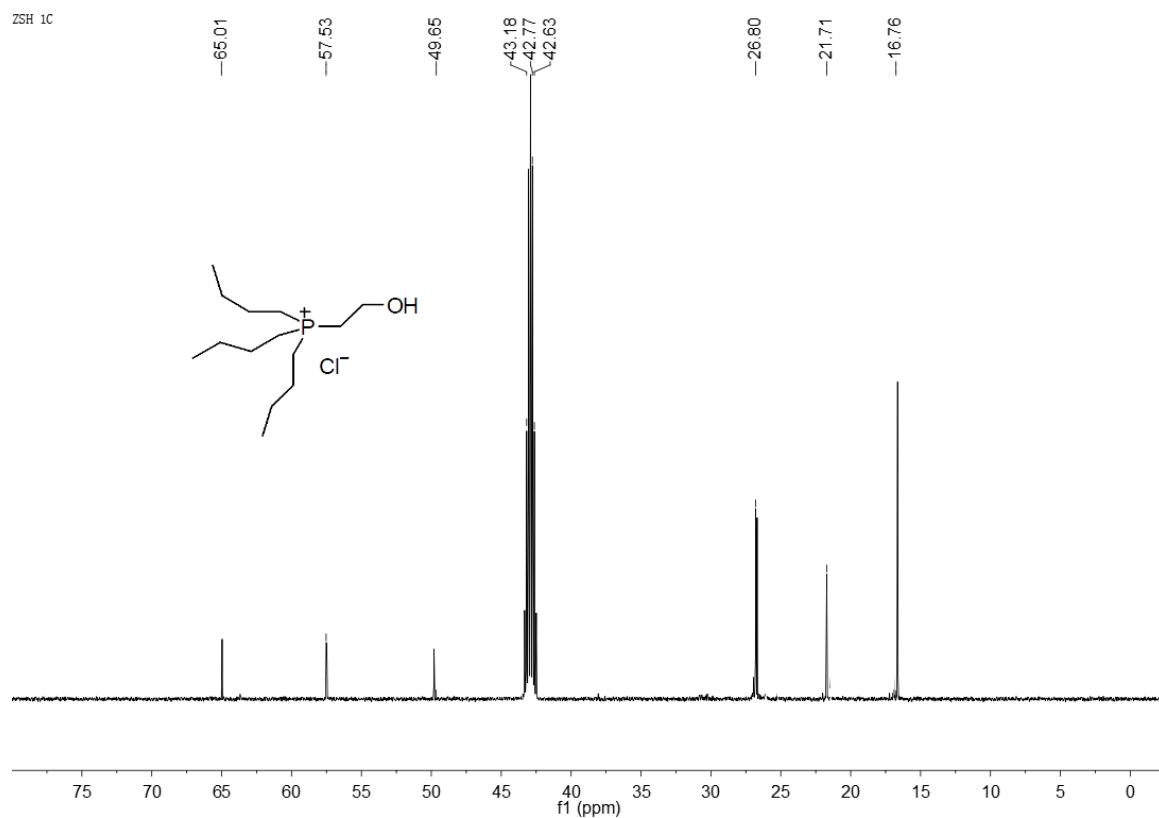

### 3. Ionic salt [BuPy]Cl

ZSH 3H

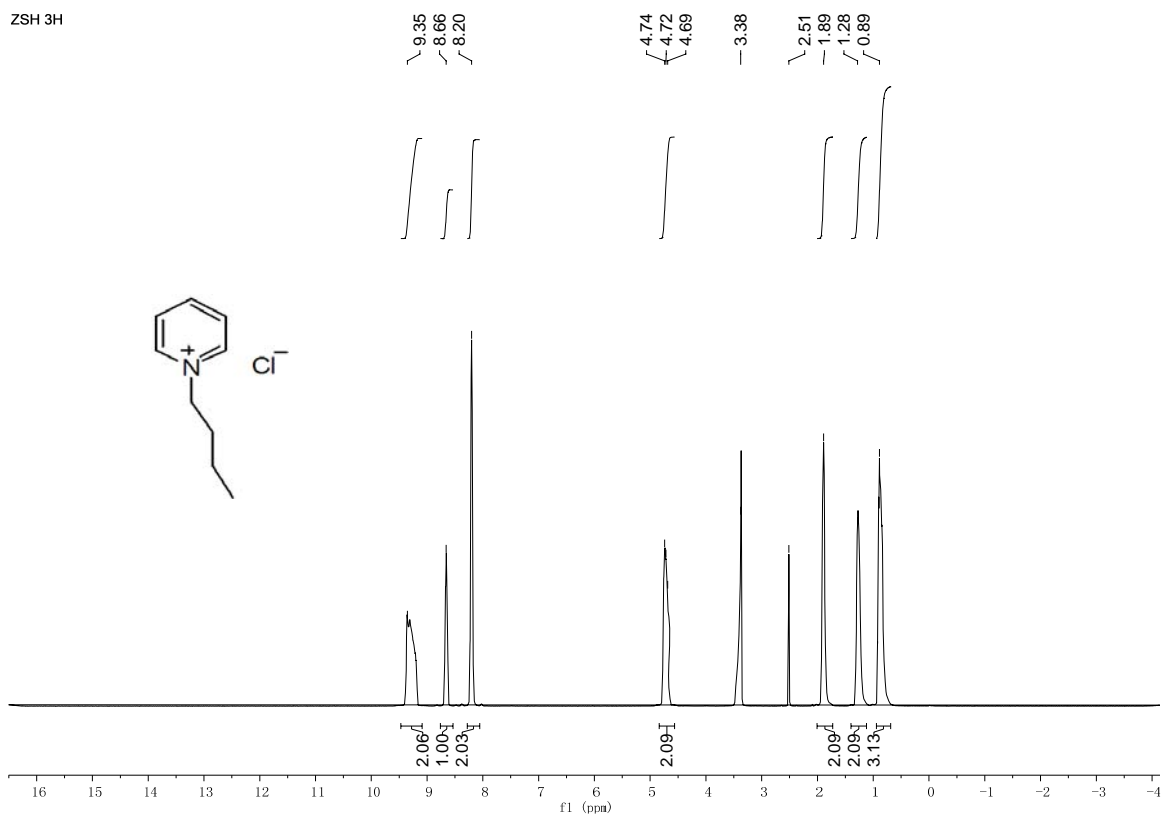

**<sup>1</sup>H-NMR spectrum (500 MHz, DMSO-*d*<sub>6</sub>)**

ZSH 3C

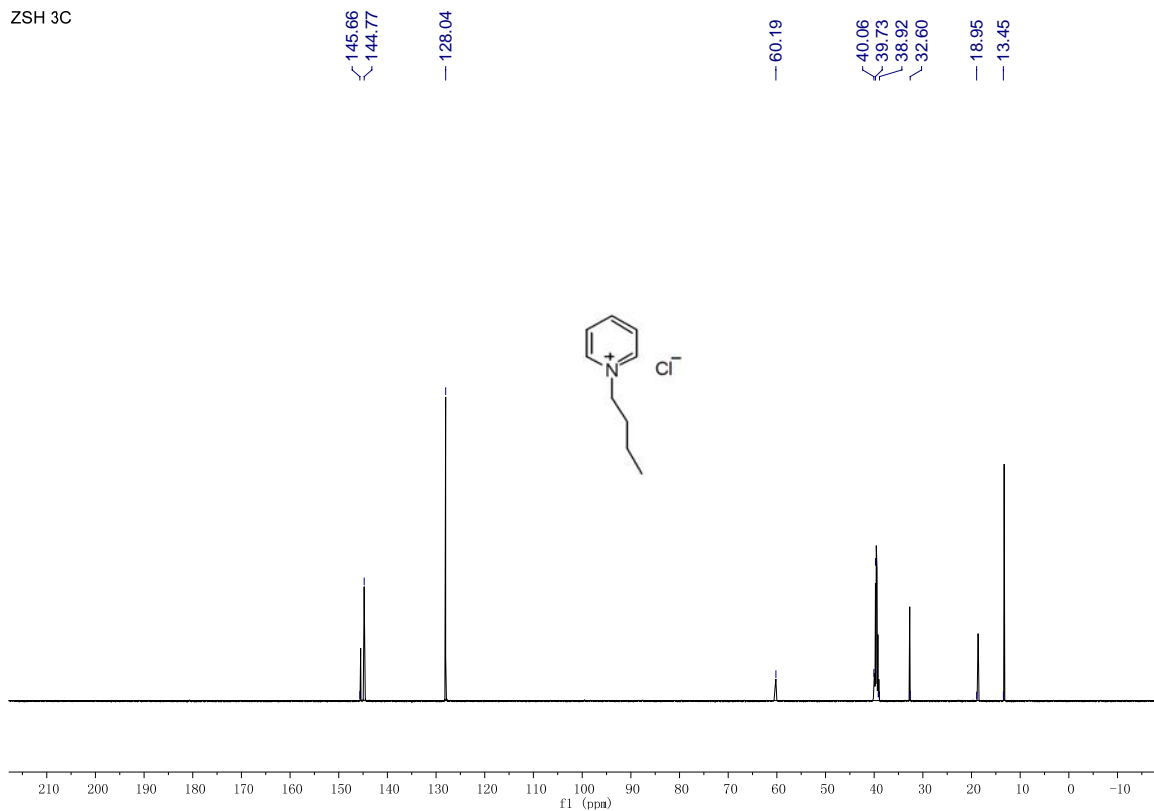

**<sup>13</sup>C-NMR spectrum (126 MHz, DMSO-*d*<sub>6</sub>)**

#### 4. 2-[(4-Fluoro-phenyl)-hydroxy-methyl]-acrylonitrile (Table 2, entry 3)

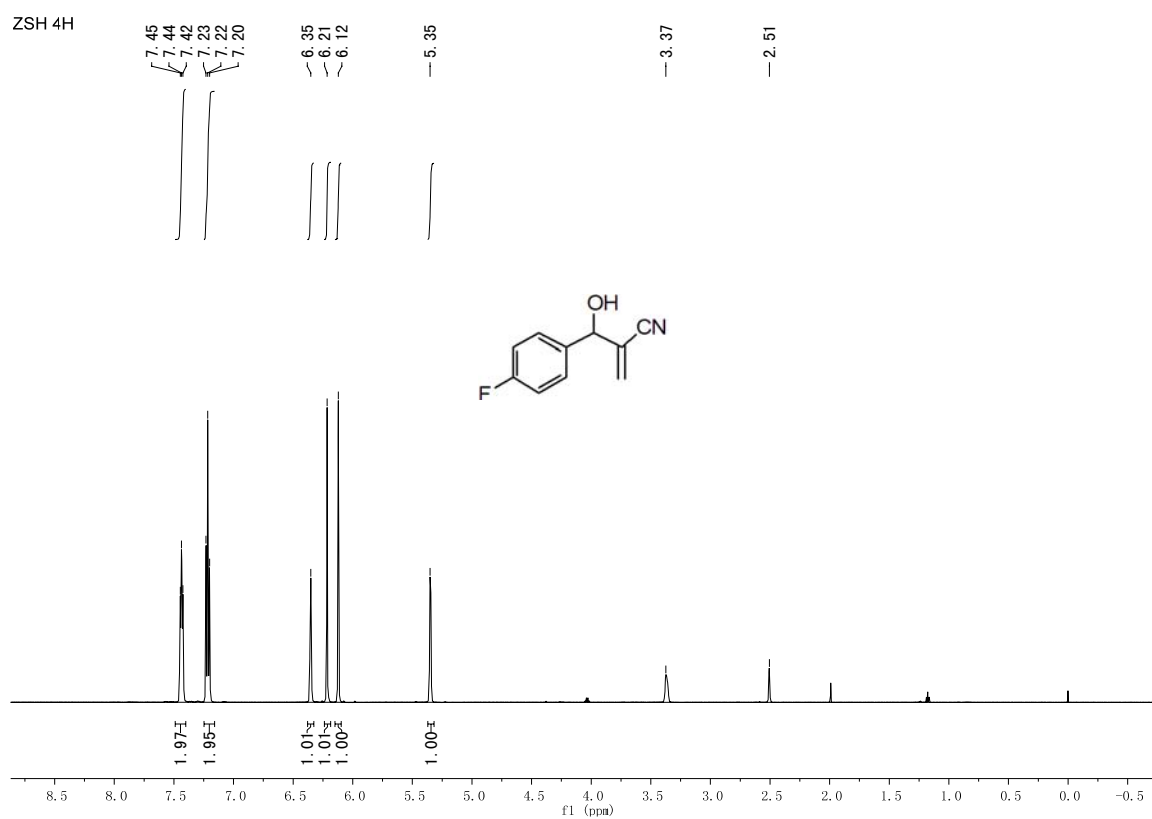

**<sup>1</sup>H-NMR spectrum (600 MHz, DMSO-*d*<sub>6</sub>)**

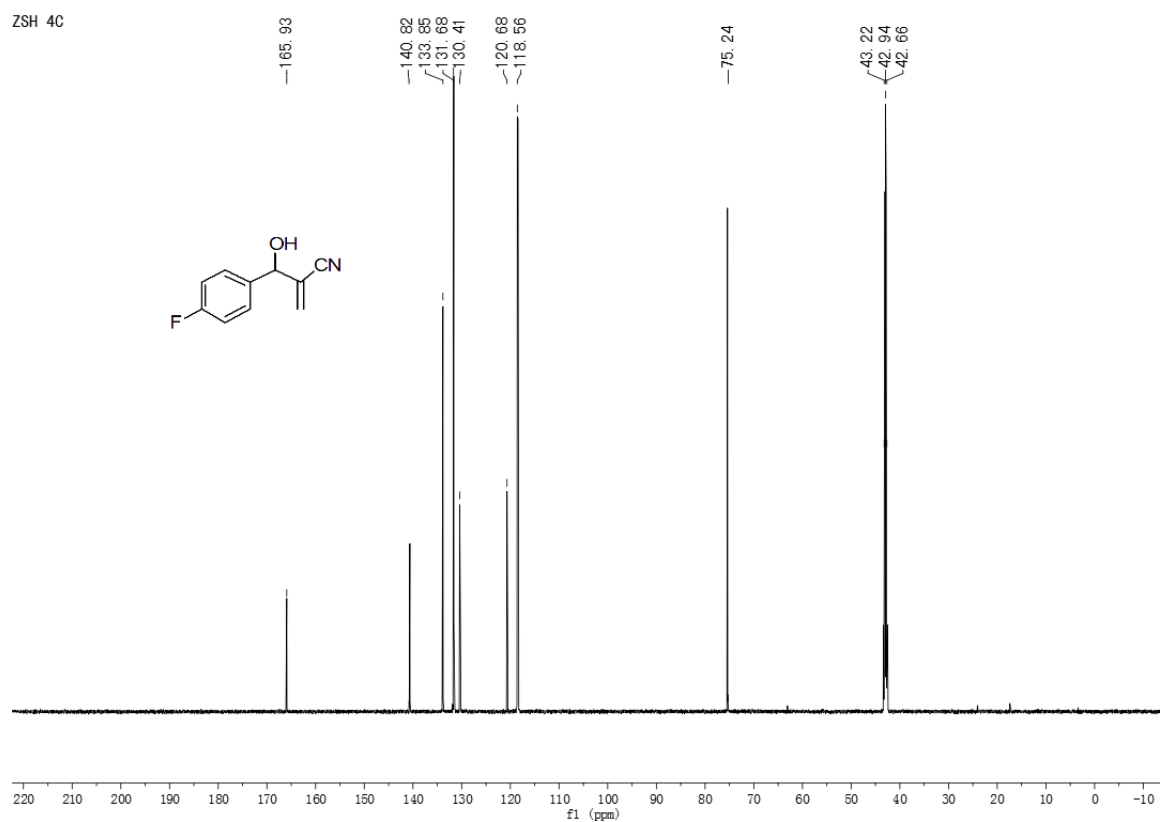

**<sup>13</sup>C-NMR spectrum (151 MHz, DMSO-*d*<sub>6</sub>)**

## 5. 2-[Hydroxy-(3-nitro-phenyl)-methyl]-acrylonitrile (Table 2, entry 5)

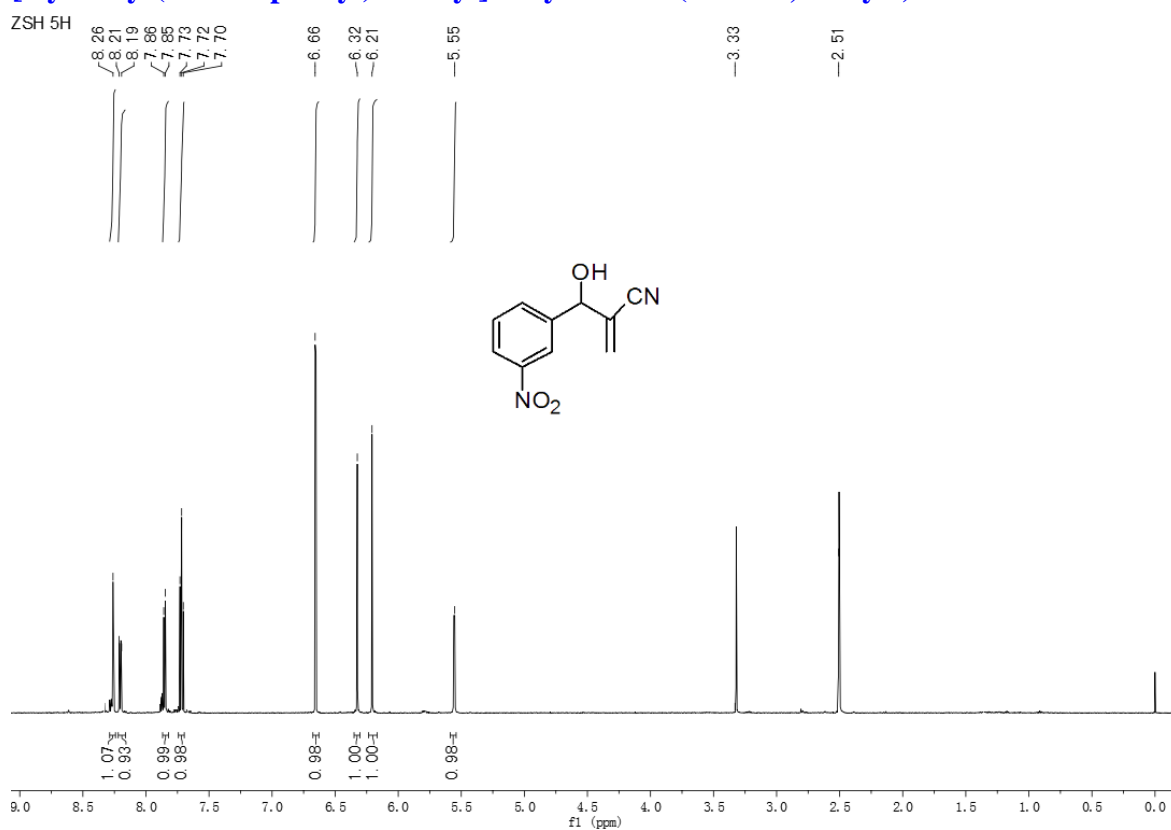

**<sup>1</sup>H-NMR spectrum (600 MHz, DMSO-*d*<sub>6</sub>)**

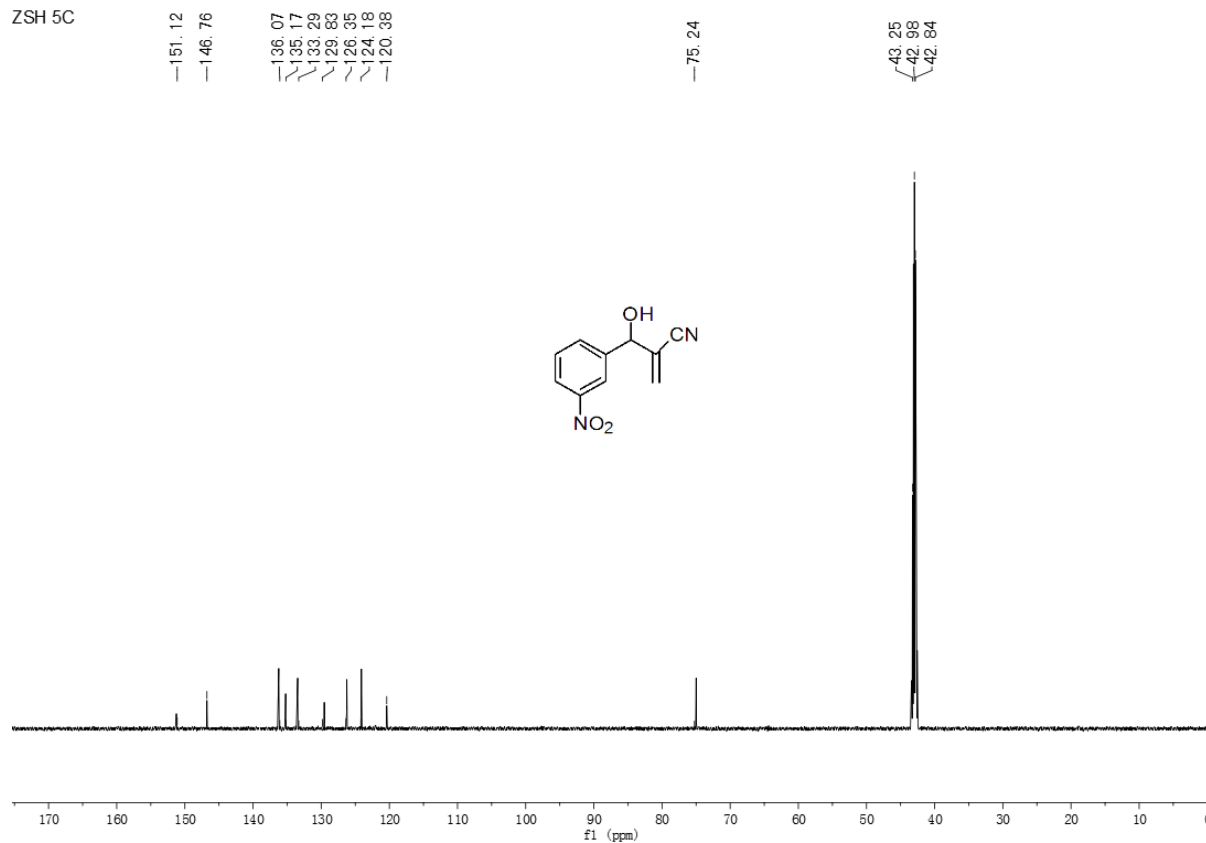

**<sup>13</sup>C-NMR spectrum (151 MHz, DMSO-*d*<sub>6</sub>)**

6. 2-(Hydroxy-naphthalen-1-yl-methyl)-acrylonitrile (Table 2, entry 12)

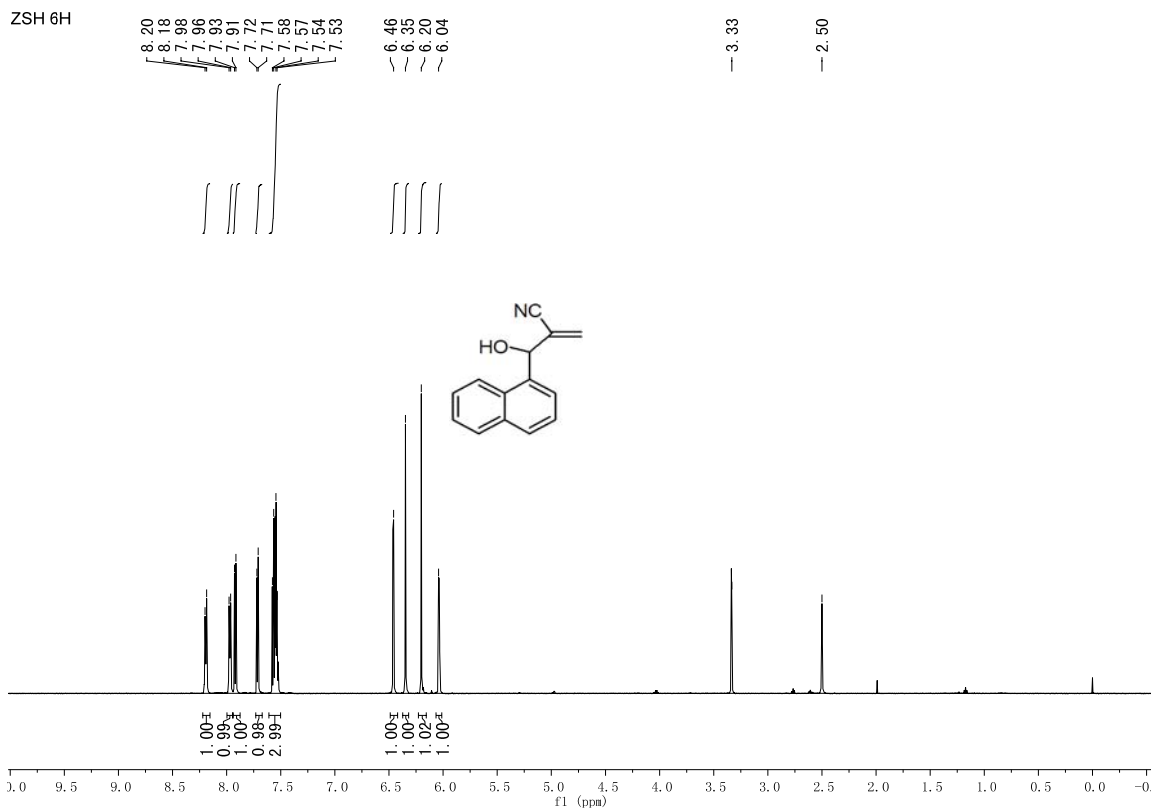

<sup>1</sup>H-NMR spectrum (600 MHz, DMSO-*d*<sub>6</sub>)

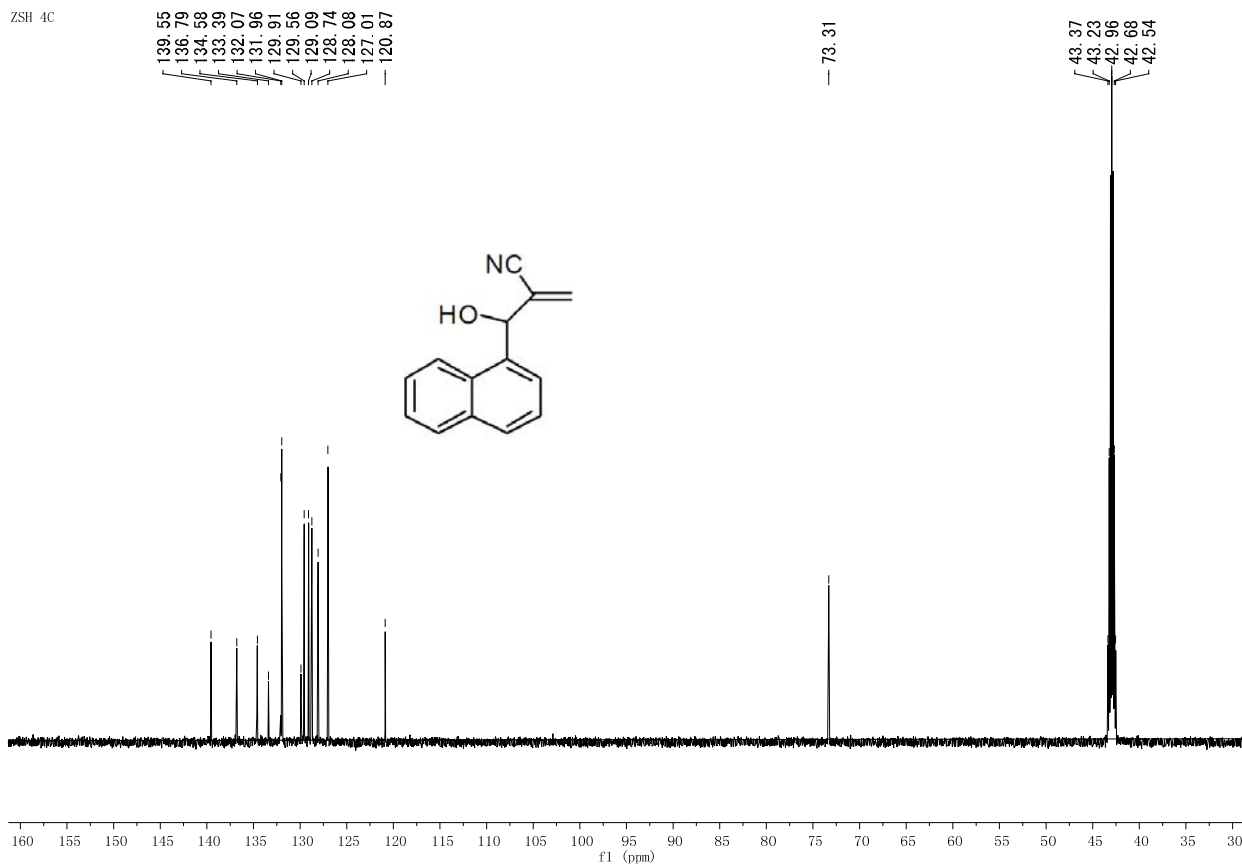

<sup>13</sup>C-NMR spectrum (151 MHz, DMSO-*d*<sub>6</sub>)

## 7. 2-[(3,4-Dichloro-phenyl)-hydroxy-methyl]-acrylonitrile (Table 2, entry 6)

ZSH 7H

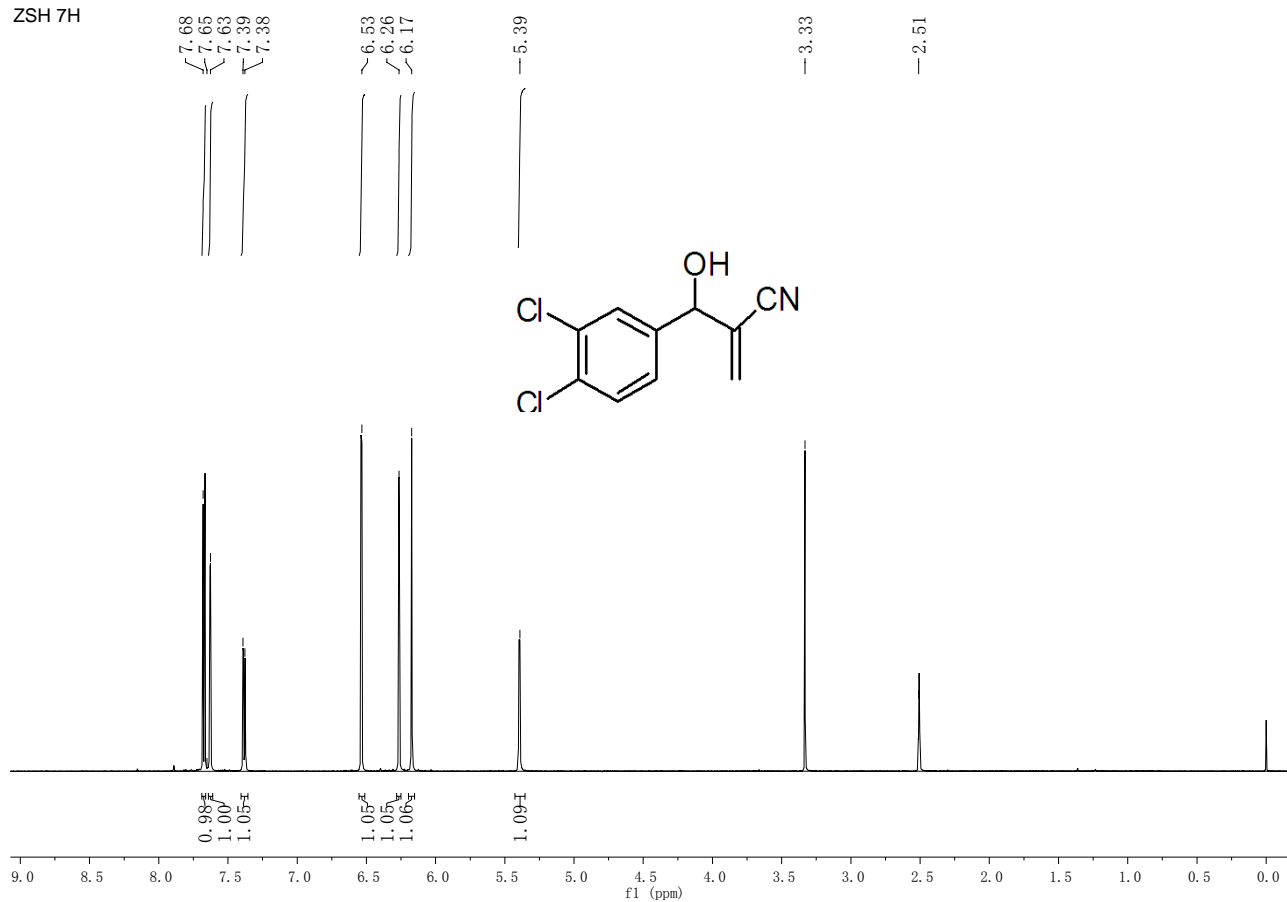

ZSH 7C

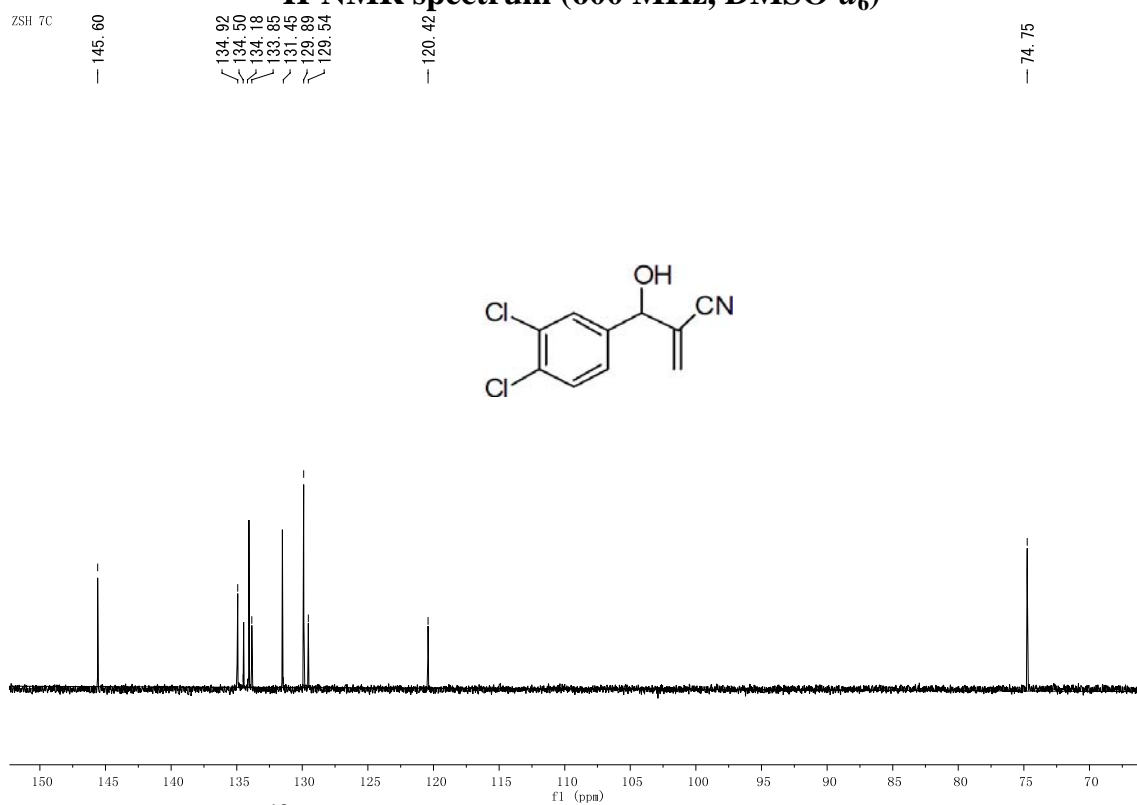



### 8. 3-Hydroxy-2-methylene-hexanenitrile (Table 2, entry 16)

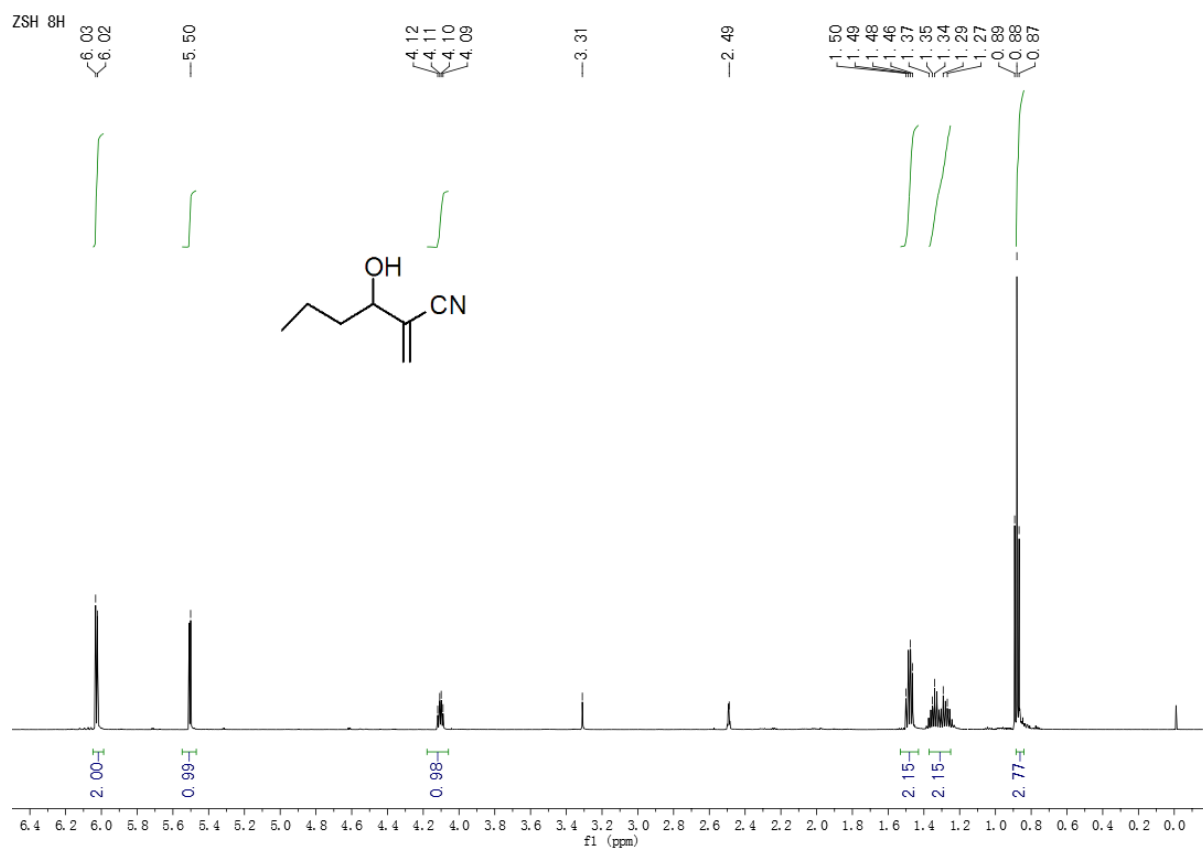

### <sup>1</sup>H-NMR spectrum (600 MHz, DMSO-*d*<sub>6</sub>)

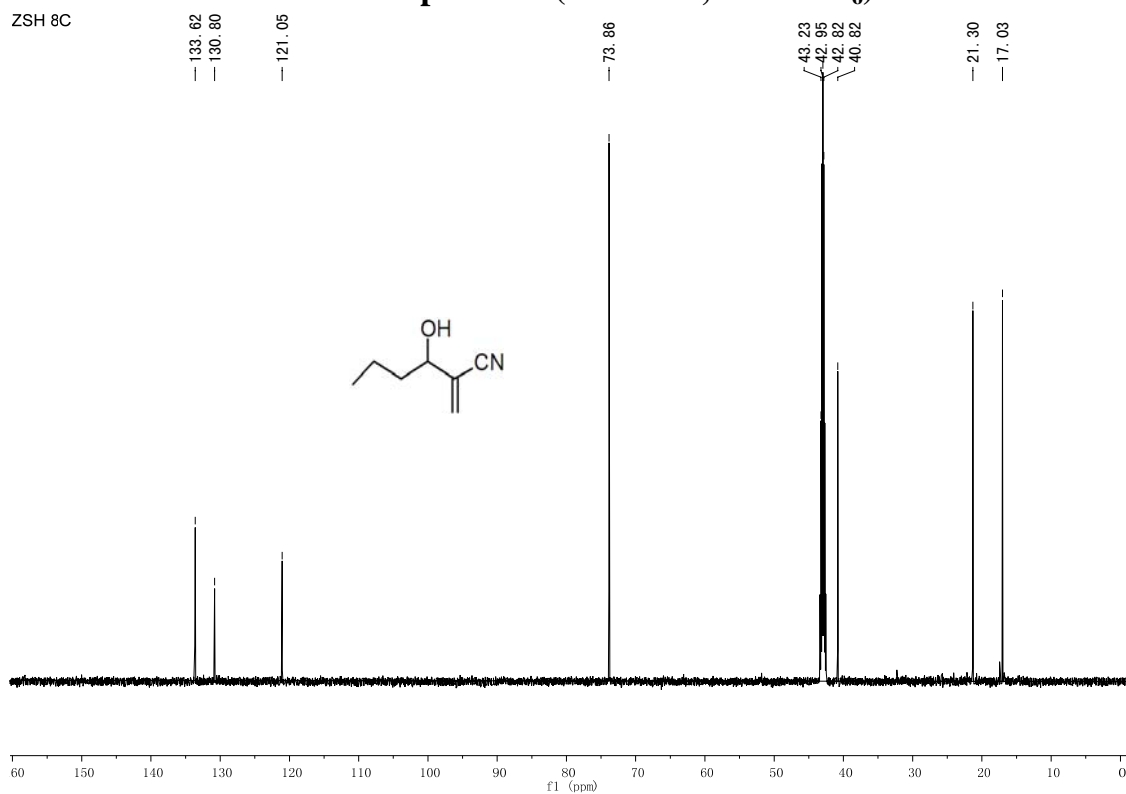

### <sup>13</sup>C-NMR spectrum (151 MHz, DMSO-*d*<sub>6</sub>)

## 9. 2-(Hydroxy-phenyl-methyl)-acrylonitrile (Table 2, entry 1)

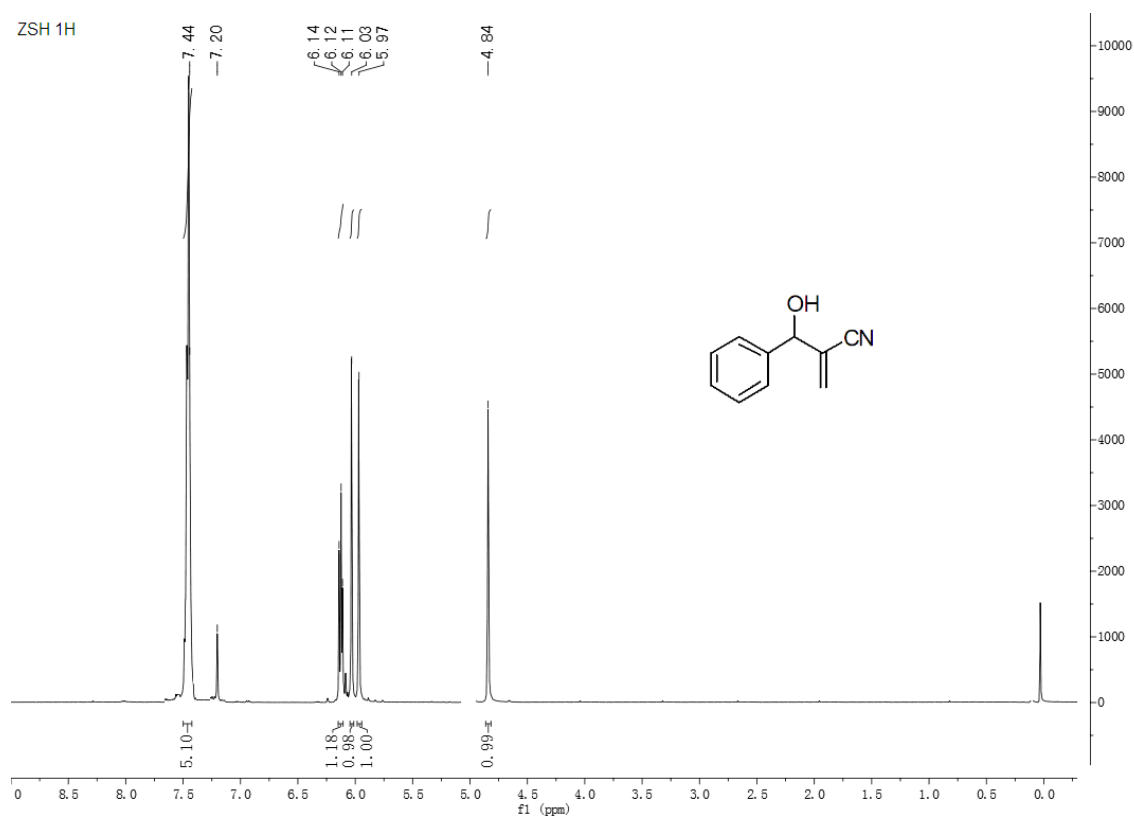

**<sup>1</sup>H-NMR spectrum (400 MHz, CDCl<sub>3</sub>)**

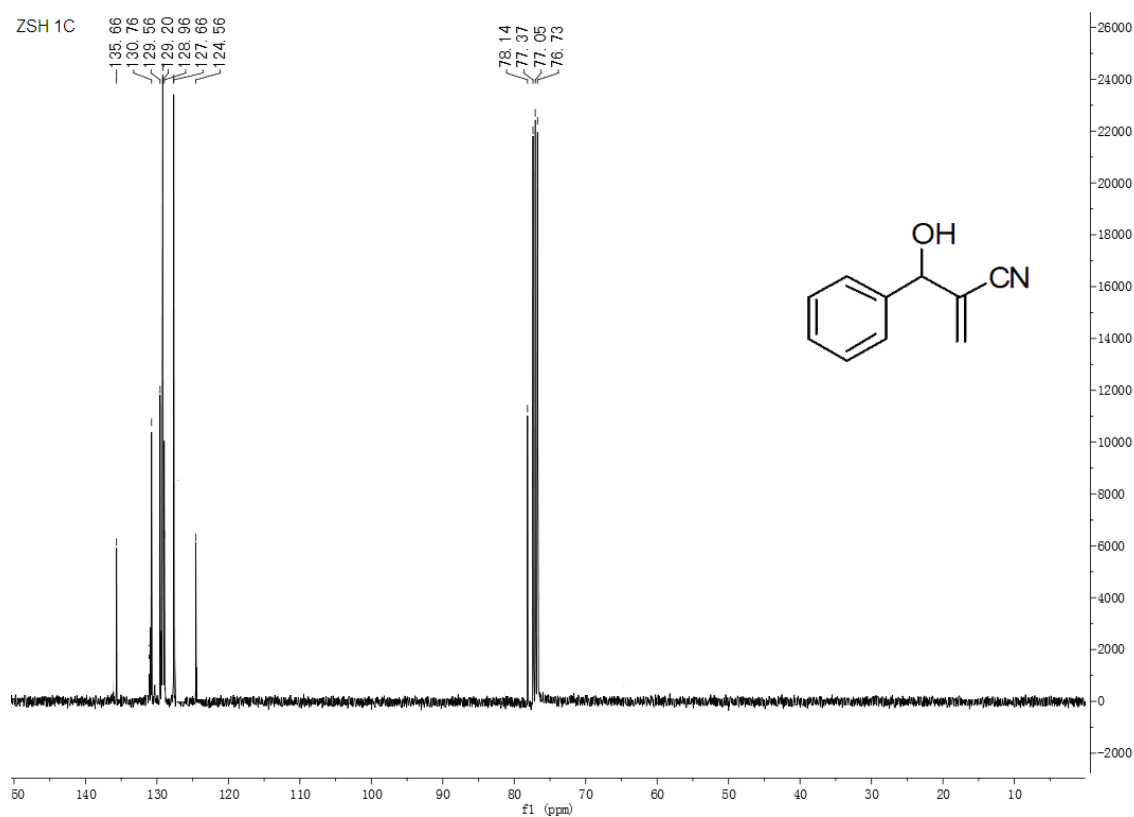

**<sup>13</sup>C-NMR spectrum (101 MHz, CDCl<sub>3</sub>)**

## 10. 2-[Hydroxy-(2-methoxy-phenyl)-methyl]-acrylonitrile (Table 2, entry 9)

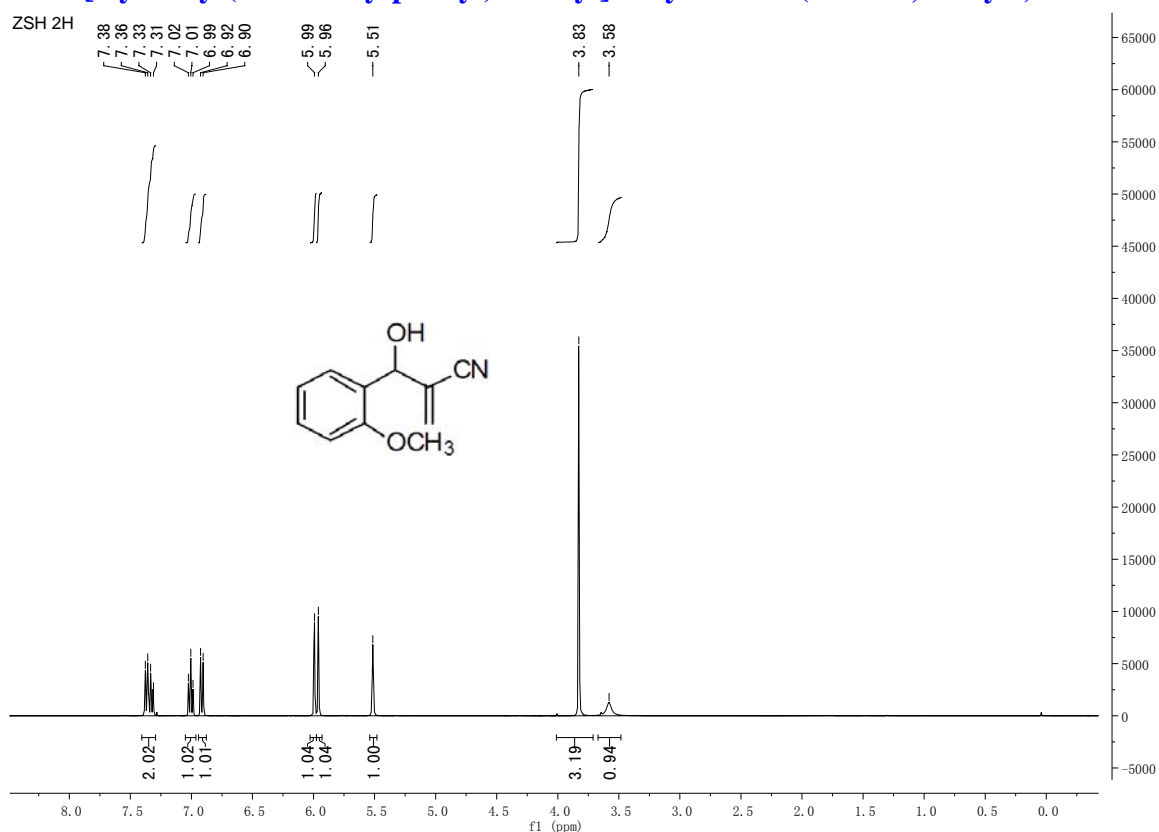

**<sup>1</sup>H-NMR spectrum (400 MHz, CDCl<sub>3</sub>)**

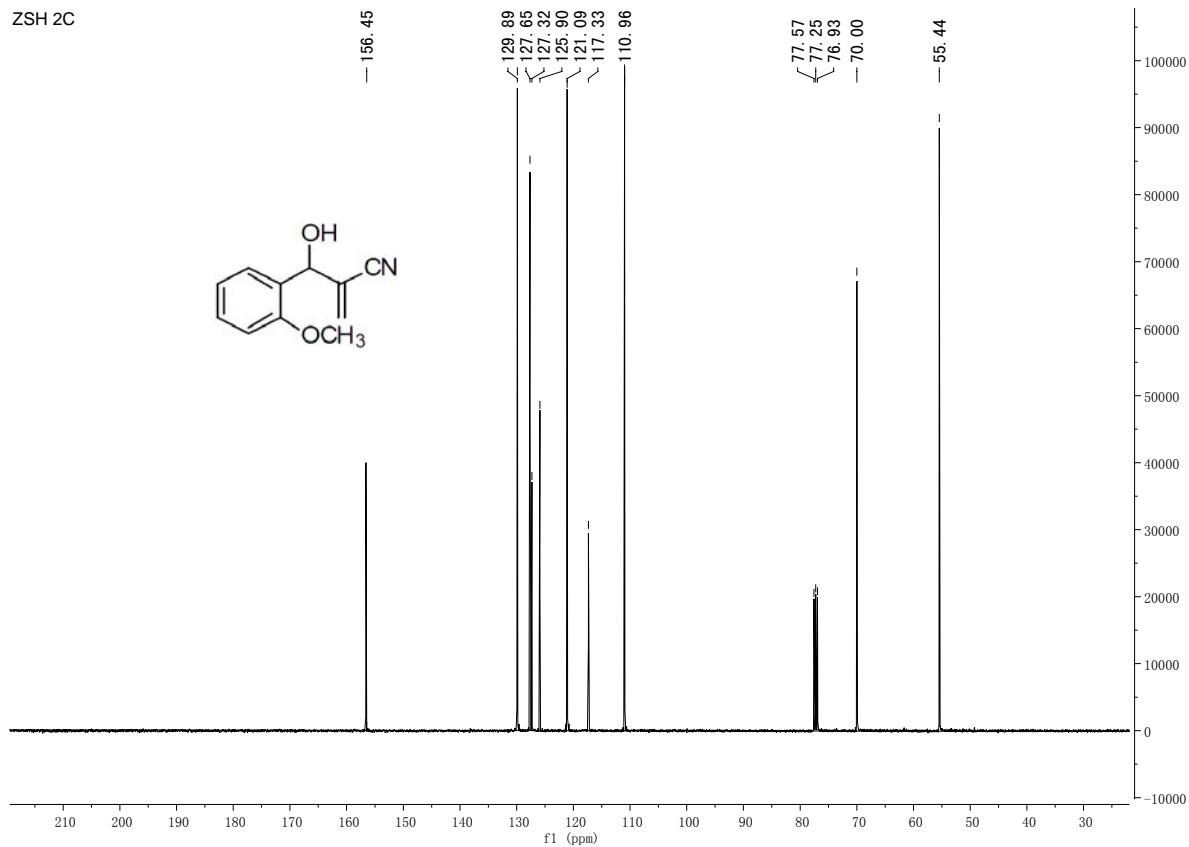

**<sup>13</sup>C-NMR spectrum (101 MHz, CDCl<sub>3</sub>)**

11. 2-[Hydroxy-(4-nitro-phenyl)-methyl]-acrylonitrile (Table 2, entry 4)

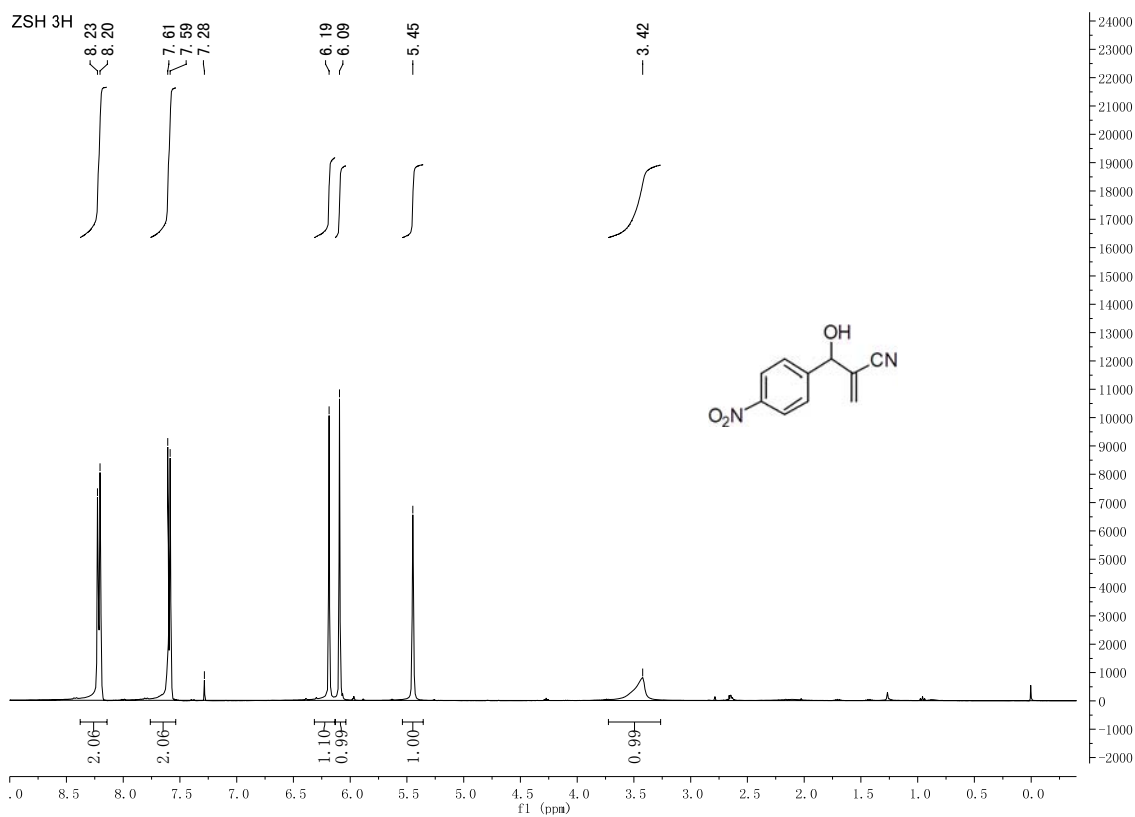

<sup>1</sup>H-NMR spectrum (400 MHz, CDCl<sub>3</sub>)

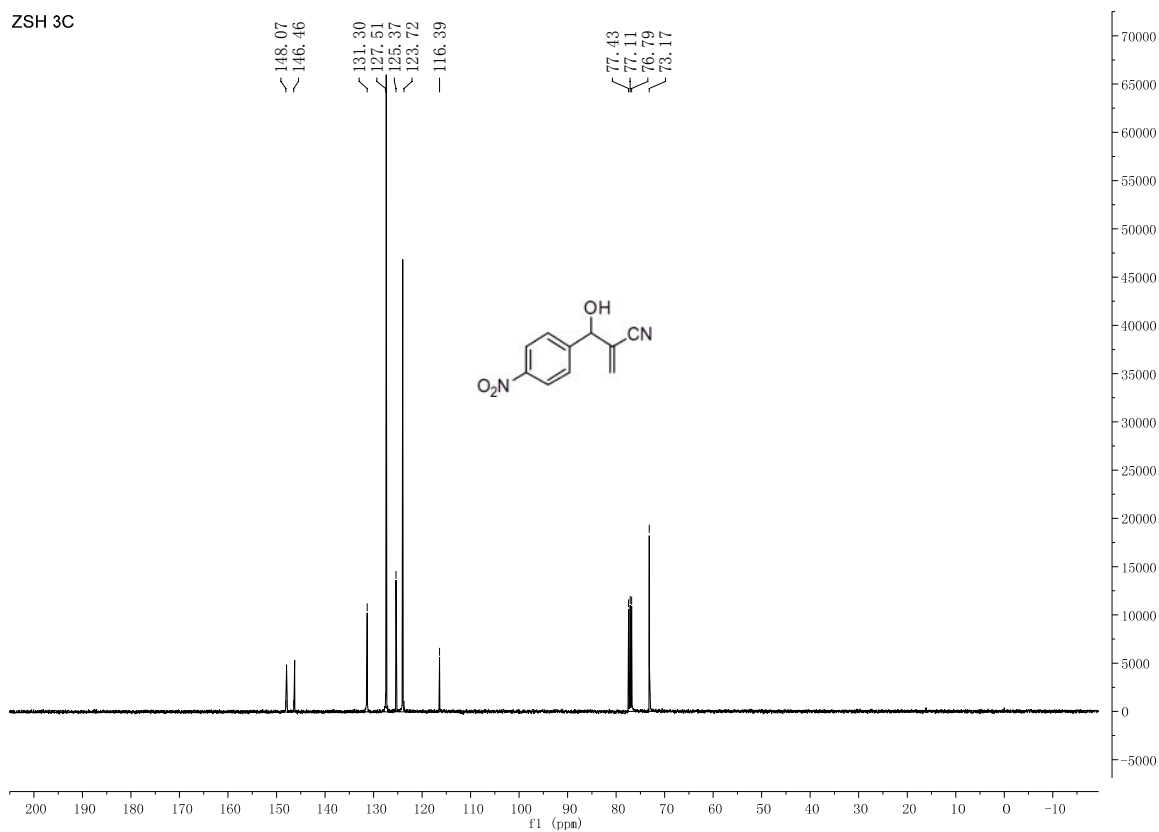

<sup>13</sup>C-NMR spectrum (101 MHz, CDCl<sub>3</sub>)

## 12. 2-[(4-chloro-phenyl)-hydroxy-methyl]-acrylonitrile (Table 2, entry 2)

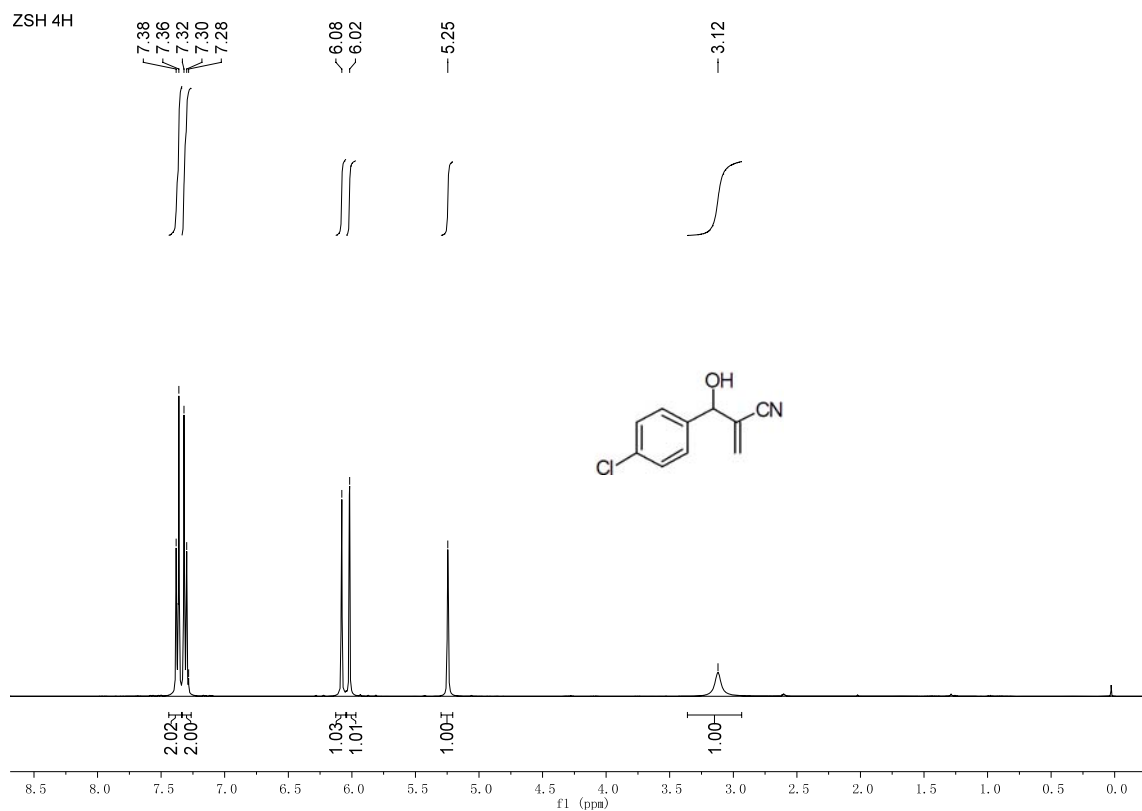

**<sup>1</sup>H-NMR spectrum (400 MHz, CDCl<sub>3</sub>)**

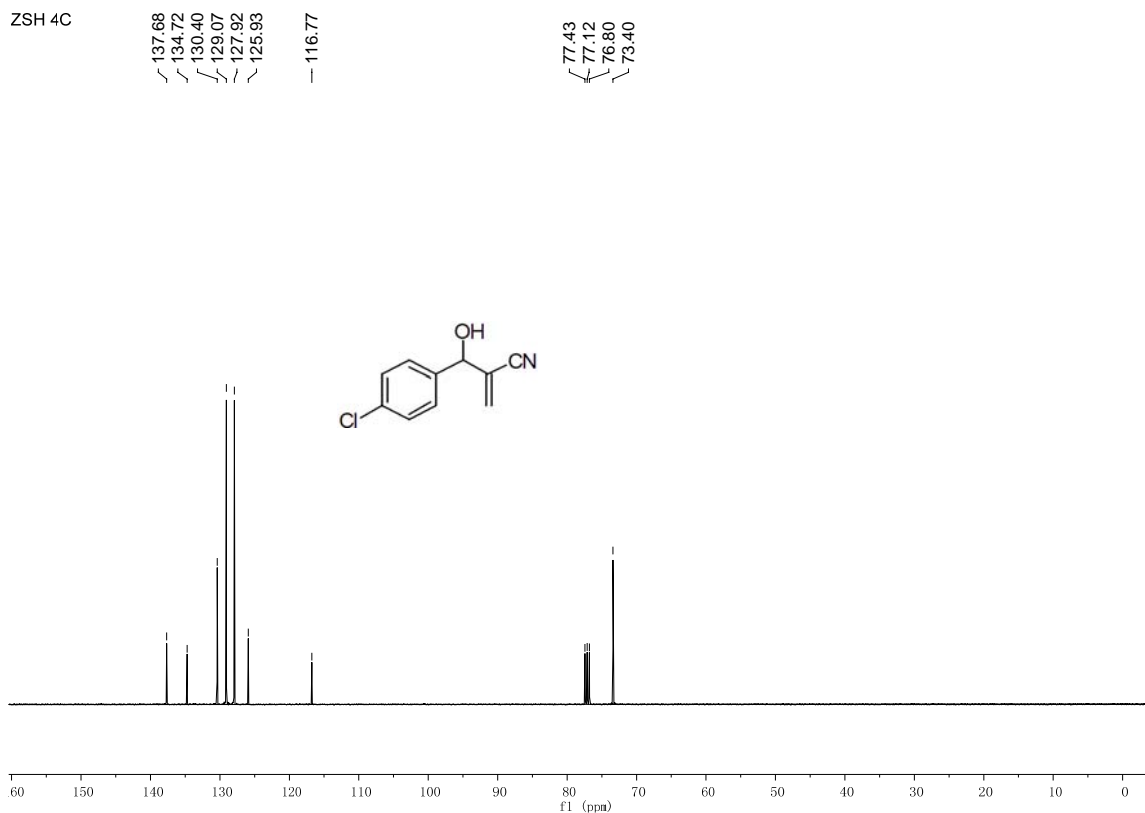

**<sup>13</sup>C-NMR spectrum (101 MHz, CDCl<sub>3</sub>)**

13. 2-[[4-(2-Cyano-1-hydroxy-allyl)-phenyl]-hydroxy-methyl]-acrylonitrile (Table 2, entry 10)

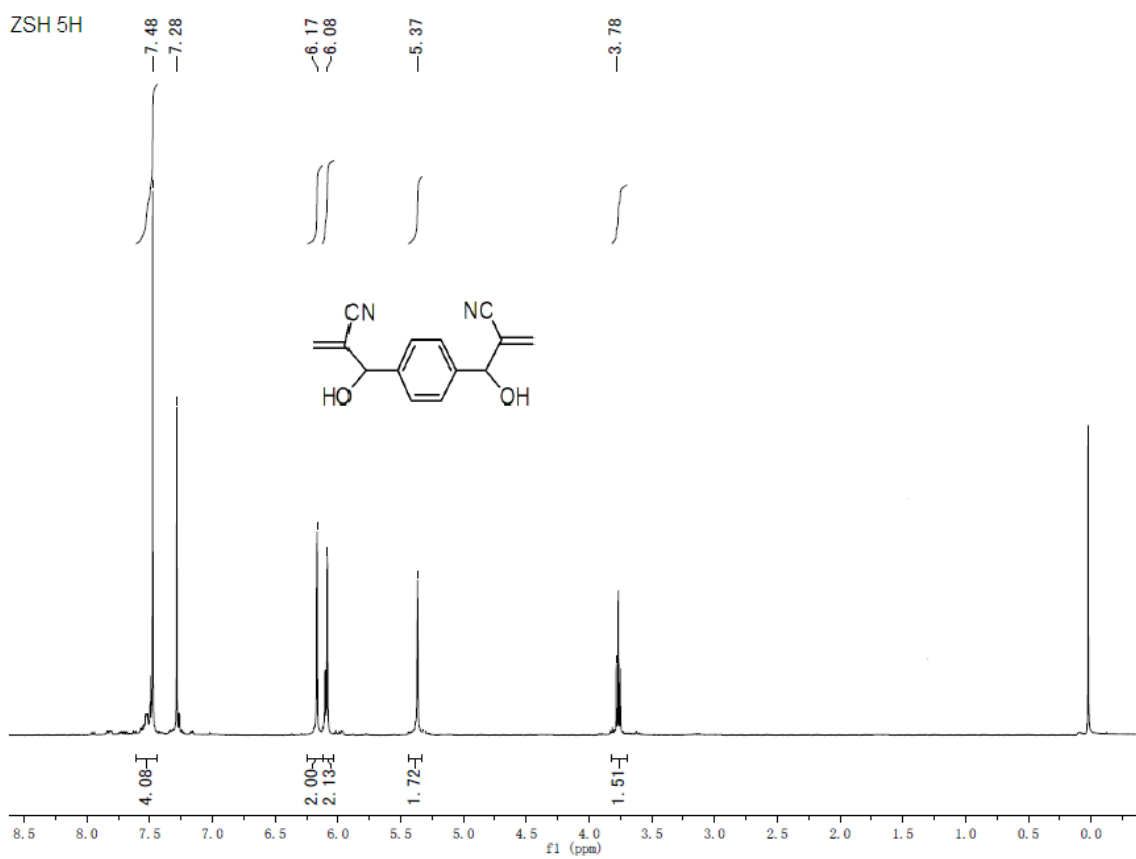

<sup>1</sup>H-NMR spectrum (400 MHz, CDCl<sub>3</sub>)

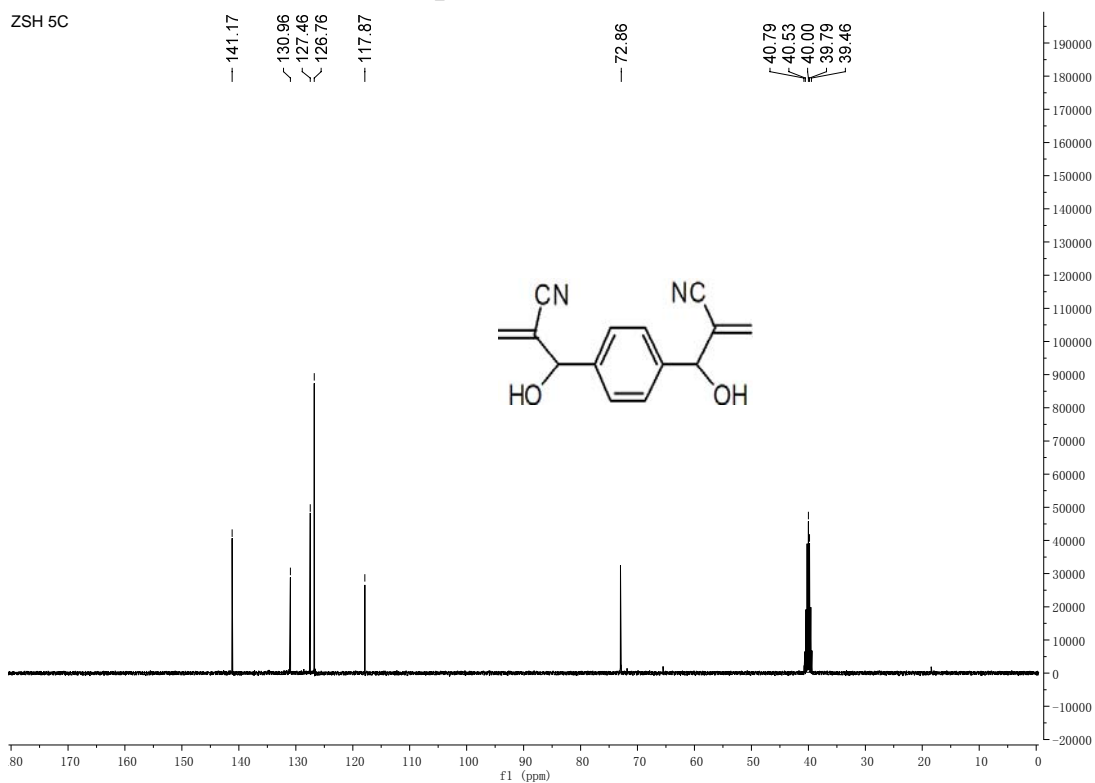

<sup>13</sup>C-NMR spectrum (101 MHz, CDCl<sub>3</sub>)

14. 2-[Hydroxy-(4-nitro-phenyl)-methyl]-acrylic acid methyl ester (Table 2, entry 19)

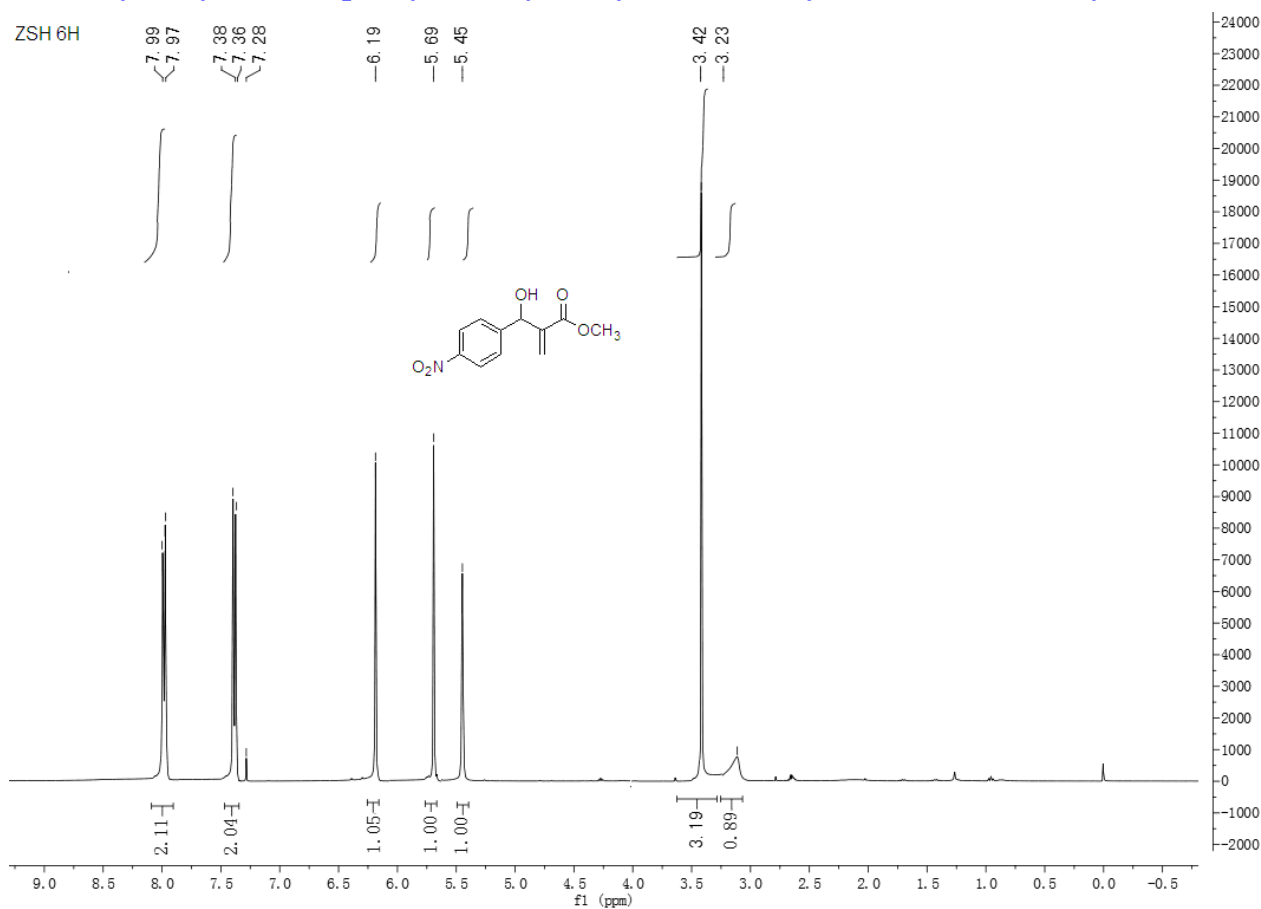

<sup>1</sup>H-NMR spectrum (300 MHz, CDCl<sub>3</sub>)

15. 2-[(4-Chloro-phenyl)-hydroxy-methyl]-acrylic acid methyl ester (Table 2, entry 18)

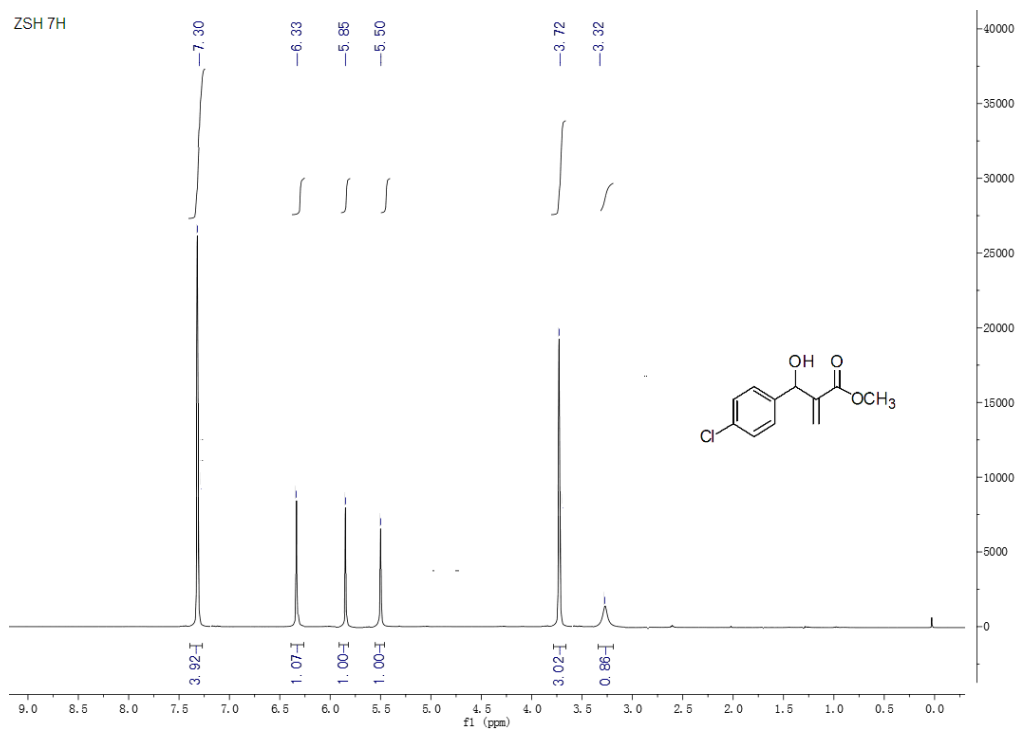

<sup>1</sup>H-NMR spectrum (300 MHz, CDCl<sub>3</sub>)

### 16. 2-(Hydroxy-phenyl-methyl)-acrylic acid methyl ester (Table 2, entry 17)

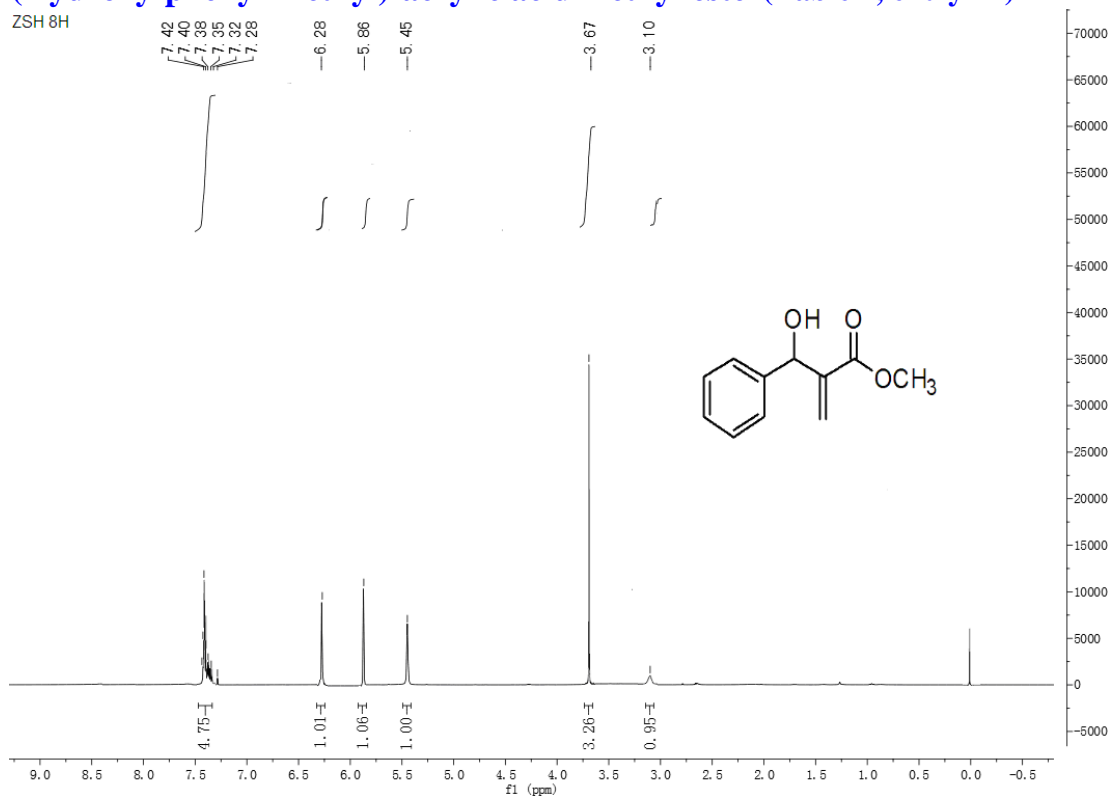

<sup>1</sup>H-NMR spectrum (300 MHz, CDCl<sub>3</sub>)

### 17. 2-(Hydroxy-p-tolyl-methyl)-acrylic acid methyl ester (Table 2, entry 20)

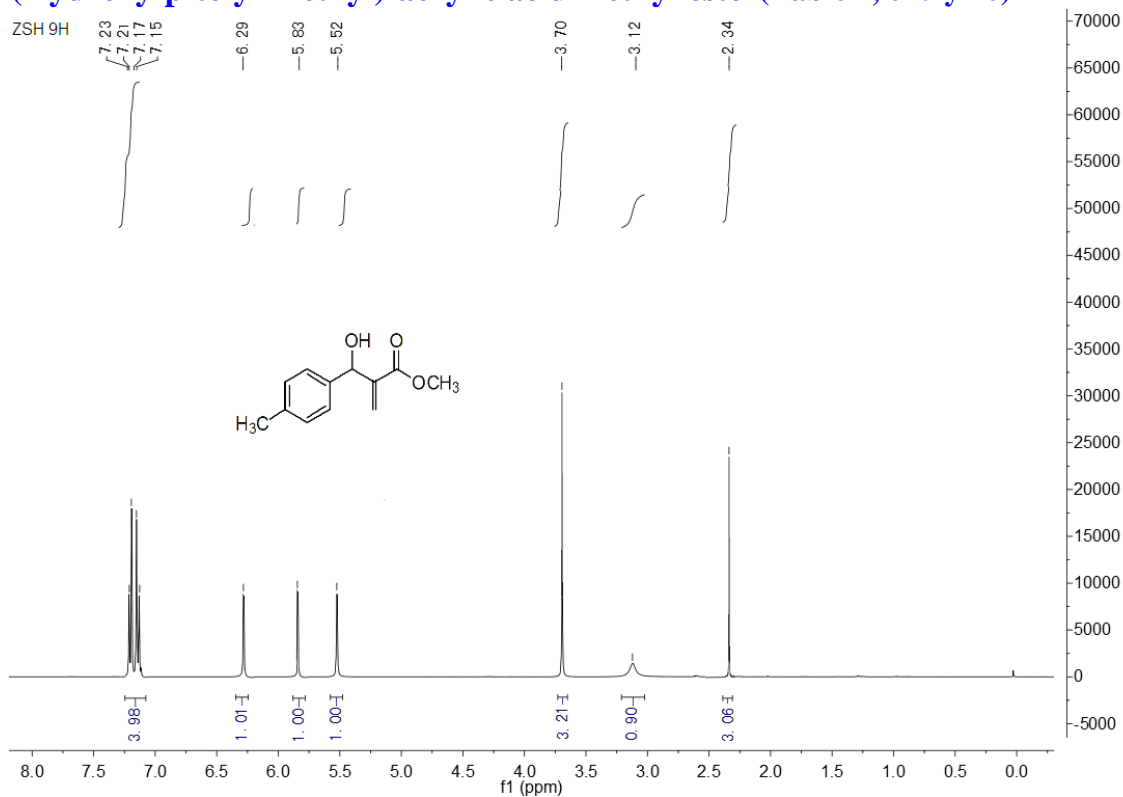

<sup>1</sup>H-NMR spectrum (300 MHz, CDCl<sub>3</sub>)



### 18. 2-[(4-nitro-phenyl)-hydroxy-methyl]-acrylic acid butyl ester (Table 2, entry 21)

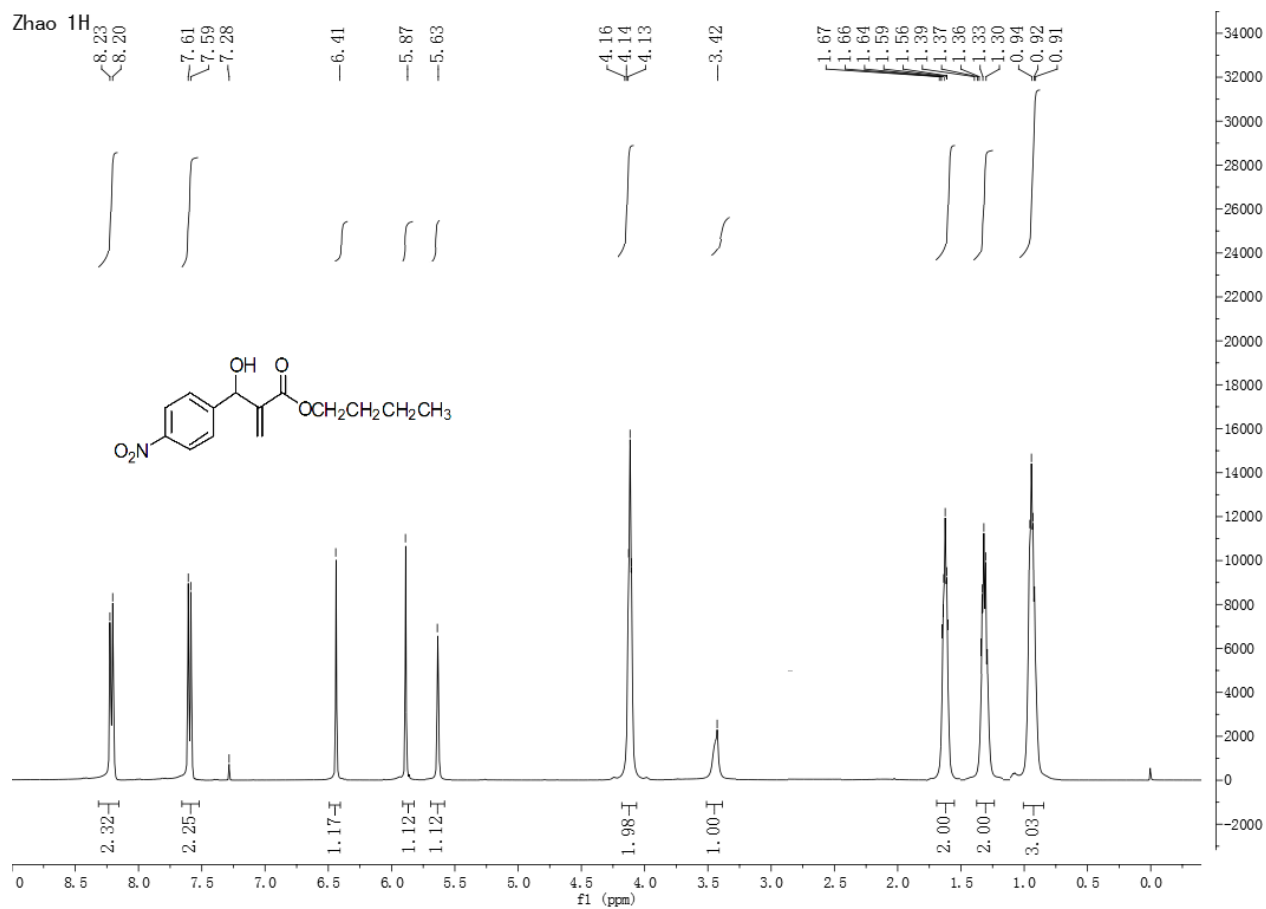

**<sup>1</sup>H-NMR spectrum (400 MHz, CDCl<sub>3</sub>)**
